# Supplementary material for: Acute kidney injury treated with renal replacement therapy and 5-year mortality after myocardial infarction-related cardiogenic shock: a nationwide population-based cohort study
Source: PubMed Central journal article supplement (PMC4699352; doi:10.1186/s13054-015-1170-8), 2015-12-30

**SUPPLEMENTAL MATERIAL:**

**Figure e1:** Flowchart of study population

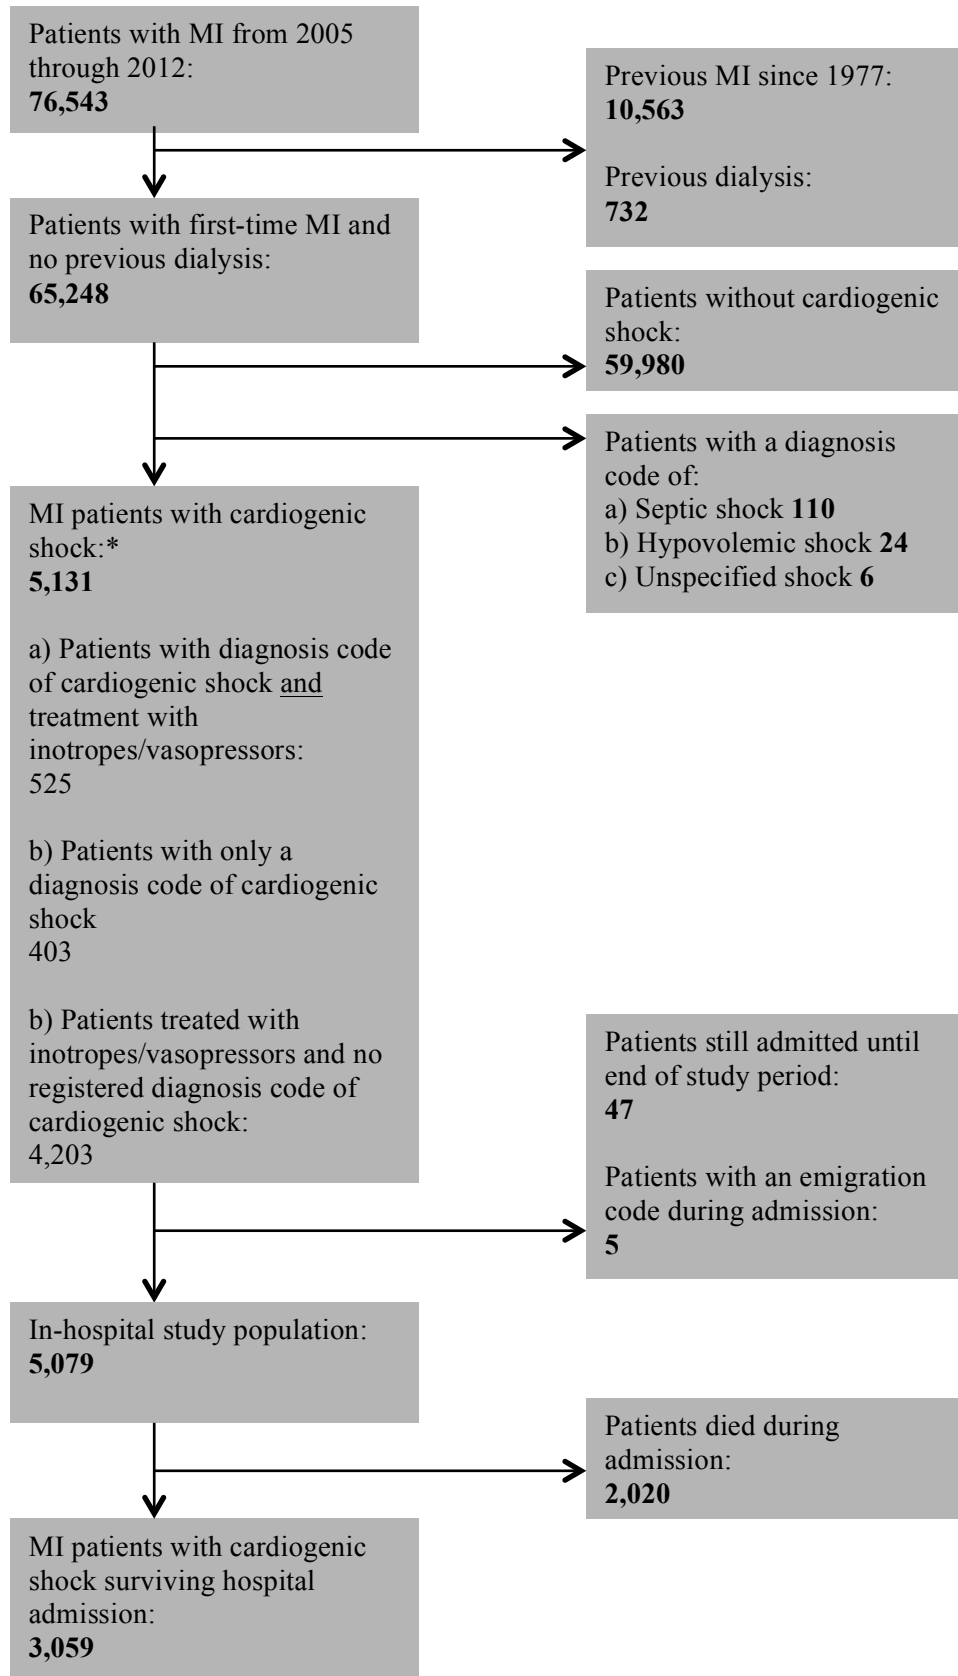

| <b>Tabel e2: Cause of death (immediate):</b><br><b>(Cause specific death after discharge for MI and cardiogenic shock – see inclusion criteria)</b> | <b>ICD-codes:</b><br><b>(From date of discharge for all ICD-codes)</b>                                                                                                              |
|-----------------------------------------------------------------------------------------------------------------------------------------------------|-------------------------------------------------------------------------------------------------------------------------------------------------------------------------------------|
| Disease of circulatory system:                                                                                                                      | I00-99                                                                                                                                                                              |
| Congestive heart failure                                                                                                                            | I50; I11.0; I13.0; I13.2                                                                                                                                                            |
| AMI                                                                                                                                                 | I21                                                                                                                                                                                 |
| Chronic ischemic heart disease                                                                                                                      | I25                                                                                                                                                                                 |
| Atrial fibrillation/flutter                                                                                                                         | I48                                                                                                                                                                                 |
| Stroke, ischemic;                                                                                                                                   | I63-64                                                                                                                                                                              |
| Venous thromboembolism                                                                                                                              | I80.1-3, I26                                                                                                                                                                        |
| Disease in kidney:                                                                                                                                  | DN00-19<br>I12, I13, I15.0, I15.1<br>Q61.1-Q61.4<br>E10.2; E11.2; E14.2<br>N26, N27                                                                                                 |
| Chronic dialysis                                                                                                                                    | N18.5                                                                                                                                                                               |
| Chronic kidney disease                                                                                                                              | N04, N00, N01, N03, N05<br><br>I12, I13, I15.0, I15.1<br><br>N11, N14, N15, N16<br><br>Q61.1-Q61.4<br><br>E10.2; E11.2; E14.2, N08.3<br><br>N18.1-4, N18.9, N19, N26, N27, N07, N08 |
| Disease in respiratory system:                                                                                                                      | J00-99                                                                                                                                                                              |
| Chronic pulmonary disease                                                                                                                           | J40-J47; J60-J67; J68.4; J70.1;<br>J70.3; J84.1; J92.0; J96.1; J98.2; J98.3                                                                                                         |
| Pneumonia                                                                                                                                           | J12-J18                                                                                                                                                                             |
| Cancer                                                                                                                                              | C00-C75; C91-C95; C81-C85; C88                                                                                                                                                      |

| <b>Table e1.</b> Codes used to identify the study population, comorbidity, use of medicine, and in-hospital procedures.                                                                                                                                                                                                          |                                                                                                                                                     |
|----------------------------------------------------------------------------------------------------------------------------------------------------------------------------------------------------------------------------------------------------------------------------------------------------------------------------------|-----------------------------------------------------------------------------------------------------------------------------------------------------|
| <b>Definition of the study population</b>                                                                                                                                                                                                                                                                                        | <b>ICD-8 and ICD-10 codes:</b>                                                                                                                      |
| <p>Inclusion criteria:</p> <ol style="list-style-type: none"> <li>1. Myocardial infarction from 2005-2012</li> <li>2. Cardiogenic shock               <ol style="list-style-type: none"> <li>a) Diagnosis code with cardiogenic shock</li> <li>b) Procedure code of treatment with inotropes/vasopressors</li> </ol> </li> </ol> | <p>ICD-10: I21</p> <p>ICD-10: R570</p> <p>Procedure codes: BFHC93A-C, BFHC92B-F</p>                                                                 |
| <p>Exclusion criteria:</p> <ol style="list-style-type: none"> <li>1. Any previous myocardial infarction since 1977</li> <li>2. Any previous dialysis procedure</li> </ol>                                                                                                                                                        | <p>ICD-8: 410, ICD-10: I21-I23</p> <p>Procedure code: BJFD</p>                                                                                      |
| <b>Comorbidity (registered in a 10-year period preceding MI admission)</b>                                                                                                                                                                                                                                                       | <b>ICD-10 codes:</b>                                                                                                                                |
| Congestive heart failure                                                                                                                                                                                                                                                                                                         | I50; I11.0; I13.0; I13.2                                                                                                                            |
| Peripheral vascular disease                                                                                                                                                                                                                                                                                                      | I70 - I74; I77                                                                                                                                      |
| Cerebrovascular disease                                                                                                                                                                                                                                                                                                          | I60-I69; G45; G46                                                                                                                                   |
| Chronic obstructive pulmonary diseases                                                                                                                                                                                                                                                                                           | J40-J47; J60-J67; J68.4; J70.1;<br>J70.3; J84.1; J92.0; J96.1; J98.2; J98.3                                                                         |
| Hypertension                                                                                                                                                                                                                                                                                                                     | I10-I13; I15                                                                                                                                        |
| Atrial fibrillation/flutter                                                                                                                                                                                                                                                                                                      | I48                                                                                                                                                 |
| Chronic renal disease                                                                                                                                                                                                                                                                                                            | N04, N00, N01, N03, N05<br>I12, I13, I15.0, I15.1<br>N11, N14, N15, N16<br>Q61.1-Q61.4<br>E10.2; E11.2; E14.2, N08.3<br>N18-N19, N26, N27, N07, N08 |
| Venous thromboembolism                                                                                                                                                                                                                                                                                                           | I80.1-3, I26                                                                                                                                        |
| Liver disease                                                                                                                                                                                                                                                                                                                    | B18; K70.0-K70.3; K70.9; K71; K73;<br>K74; K76.0<br>B15.0; B16.0; B16.2; B19.0; K70.4; K72;                                                         |

|                                                            |                                                                                                                                                                                                                            |
|------------------------------------------------------------|----------------------------------------------------------------------------------------------------------------------------------------------------------------------------------------------------------------------------|
|                                                            | K76.6; I85                                                                                                                                                                                                                 |
| Diabetes                                                   | E10.0, E10.1; E10.9<br><br>E11.0; E11.1; E11.9<br><br>E10.2-E10.8<br>E11.2-E11.8<br><br>ATC-codes:<br>A10A; A10B<br>For A10BA02; Metformin (patients with the diagnosis polycystic ovarian syndrome ICD-10: E282 excluded) |
| Cancer (Any tumor, leukaemia, lymphoma)                    | C00-C75; C91-C95; C81-C85; C88;                                                                                                                                                                                            |
| Obesity                                                    | E65-66                                                                                                                                                                                                                     |
| <b>Drugs (registered 100 days preceding MI admission):</b> | <b>ATC-codes/procedure codes:</b>                                                                                                                                                                                          |
| Chemotherapeutics                                          | Procedure code: BWHA<br><br>ATC-code: L01                                                                                                                                                                                  |
| ACE-inhibitors                                             | ATC: C09A; C09B                                                                                                                                                                                                            |
| Angiotensin-II-Antagonists                                 | ATC: C09C; C09D                                                                                                                                                                                                            |
| NSAIDs                                                     | ATC:<br><br>M01AE01, M01AE51; M01AE02;<br><br>M01AE03, M01AE53; M01AE14;<br>M01AC01;<br><br>M01AG02<br><br>M01AB05, M01AB55; M01AB08;<br><br>M01AX01; M01AC06.<br><br>M01AH01; M01AH02; M01AH03;<br><br>M01AH04; M01AH05.  |
| Aminoglycoside                                             | ATC: J01G                                                                                                                                                                                                                  |

|                                                                                                                  |                         |
|------------------------------------------------------------------------------------------------------------------|-------------------------|
| Cyclosporine                                                                                                     | ATC: L04AD01            |
| <b>In-hospital* procedures †</b>                                                                                 | <b>Procedure codes:</b> |
| PCI                                                                                                              | KFNG; KFNF              |
| CABG                                                                                                             | KFNA-E; KFNH20          |
| Coronary arteriography                                                                                           | UXAC85                  |
| Fibrinolysis                                                                                                     | BOHA1                   |
| <b>Subtypes of MI</b>                                                                                            | <b>ICD-10:</b>          |
| STEMI                                                                                                            | I210, I211, I212, I213  |
| Non-STEMI                                                                                                        | I214                    |
| MI unknown (without specification)                                                                               | I21, I219               |
| <b>For patients without a diagnosis code of cardiogenic shock and a procedure code for inotropi/vasopressor:</b> | <b>ICD-10:</b>          |
| Septic shock                                                                                                     | R572, A41.9A            |
| Hypovolemic shock                                                                                                | R571                    |
| Unspecified shock                                                                                                | R57, R578, R579         |

\*In-hospital is defined as the initial admission for MI, as well as any transfers to other departments on the same day or the day after discharge from initial admission.

†Because some overlap between PCI and CABG procedures was observed, they were combined as one variable to reduce the potential for co-linearity to affect the results. CAG was not included as a variable in the adjusted models because even more co-linearity exists between this procedure and PCI/CABG.

**Figure e2:** Distribution of propensity scores for the entire study population.

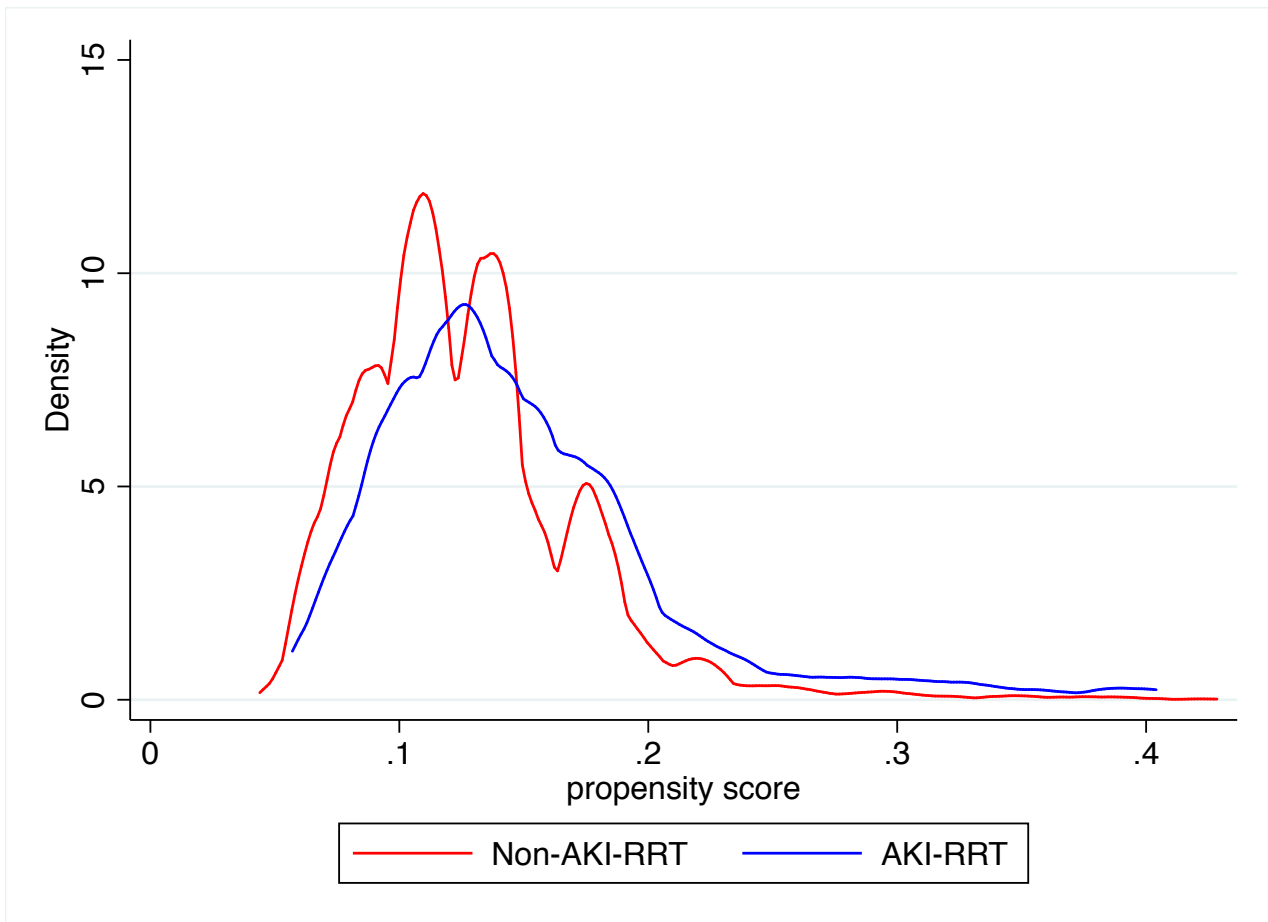

**Figure e3:** Distribution of propensity scores for the cohort of patients surviving until hospital discharge.

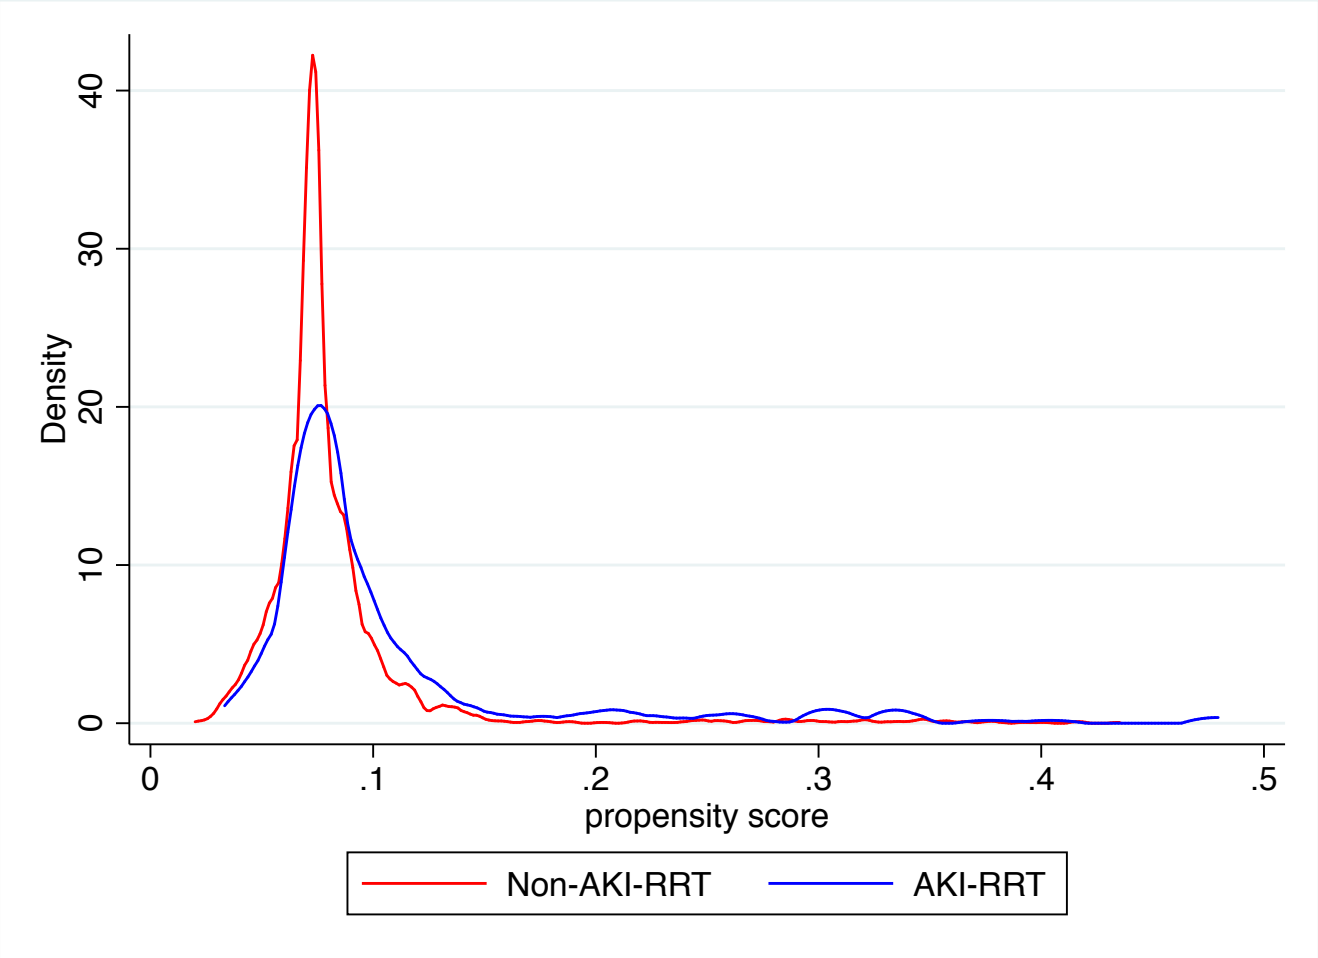

Supplement: 13054_2015_1170_MOESM1_ESM.pdf [file 13054_2015_1170_MOESM1_ESM.pdf]
